# Supplementary material
Source: PubMed Central journal article supplement (PMC8425649)
Supplement: ASN.2021010104SupplementaryData.pdf [file ASN.2021010104SupplementaryData.pdf]

## **SARS-CoV-2 Vaccine Acceptability in Patients on Dialysis: A Nationwide Survey**

**Supplemental Table 1.** Distributions of age, sex, race/ethnicity and region in the survey responders, overall US Renal Care population in comparison to the US adult dialysis population obtained through the United States Renal Data System (USRDS).

**Supplemental Table 2.** Characteristics of survey responders by vaccine-hesitant status

**Supplemental Figure 1.** Location of zip codes from which surveys were returned and sampled facilities

**Supplemental Figure 2.** COVID-19 vaccine information sources

**Supplemental Surveys.** Surveys in English and Spanish

**Supplemental Table 1.** Distributions of age, sex, race/ethnicity and region in the survey responders, overall US Renal Care population in comparison to the US adult dialysis population obtained through the United States Renal Data System (USRDS).

|                        | USRDS<br>n=499,150 | US Renal Care     |                  |
|------------------------|--------------------|-------------------|------------------|
|                        |                    | Total<br>n=21,483 | Survey<br>n=1515 |
| <b>Age</b>             |                    |                   |                  |
| 18-44                  | 12                 | 11                | 10               |
| 45-64                  | 41                 | 40                | 40               |
| 65-79                  | 35                 | 37                | 37               |
| ≥80                    | 12                 | 12                | 10               |
| Unknown                |                    |                   | 3                |
| <b>Sex</b>             |                    |                   |                  |
| M                      | 57                 | 57                | 53               |
| F                      | 43                 | 43                | 43               |
| Missing                |                    |                   | 4                |
| <b>Race/Ethnicity,</b> |                    |                   |                  |
| Hispanic               | 18                 | 14                | 24               |
| Non-Hispanic white     | 41                 | 29                | 30               |
| Non-Hispanic Black     | 35                 | 23                | 30               |
| Other                  | 7                  | 13                | 13               |
| Unknown                | 7                  | 21                | 3                |
| <b>Region*</b>         |                    |                   |                  |
| Northeast              | 16                 | 10                | 12               |
| South                  | 43                 | 50                | 48               |
| Midwest                | 19                 | 10                | 12               |
| West                   | 22                 | 30                | 28               |

U.S. adult population in 2018, U.S. adult patients on dialysis population as of January 1, 2017.

\*Region and ZCTA poverty is based on dialysis facility location. Abbreviations: ZCTA-zip code tabulation area

**Supplemental Table 2.** Characteristics of survey responders by vaccine-hesitant status

|                                                                      | Vaccine acceptance | Vaccine hesitant | Missing<br>N=4 |
|----------------------------------------------------------------------|--------------------|------------------|----------------|
| Patient characteristics                                              | N=1092             | N=419            |                |
| <b>Age</b>                                                           |                    |                  |                |
| 18-44                                                                | 92 (8)             | 57 (13)          | 0 (0)          |
| 45-64                                                                | 425 (39)           | 183 (44)         | 0 (0)          |
| 65-79                                                                | 418 (38)           | 138 (33)         | 1 (25)         |
| ≥80                                                                  | 130 (12)           | 28 (7)           | 0 (0)          |
| Missing                                                              | 27 (3)             | 13 (3)           | 3 (75)         |
| <b>Gender</b>                                                        |                    |                  |                |
| M                                                                    | 617 (57)           | 189 (45)         | 0 (0)          |
| F                                                                    | 438 (40)           | 208 (50)         | 1 (25)         |
| Missing                                                              | 37 (3)             | 22 (5)           | 3 (75)         |
| <b>Race and Ethnicity</b>                                            |                    |                  |                |
| Hispanic                                                             | 299 (28)           | 73 (18)          | 0 (0.0)        |
| Non-Hispanic white                                                   | 352 (32)           | 95 (23)          | 1 (25)         |
| Non-Hispanic Black                                                   | 279 (26)           | 177 (42)         | 0 (0.0)        |
| Non-Hispanic Asian                                                   | 90 (8)             | 29 (7)           | 0 (0.0)        |
| Non-Hispanic other                                                   | 46 (4)             | 31 (7)           | 0 (0.0)        |
| Missing                                                              | 26 (2)             | 14 (3)           | 3 (75)         |
| <b>Region</b>                                                        |                    |                  |                |
| Northeast                                                            | 121 (11)           | 56 (13)          | 0 (0)          |
| South                                                                | 512 (46)           | 218 (52)         | 3 (75)         |
| Midwest                                                              | 128 (12)           | 57 (14)          | 0 (0)          |
| West                                                                 | 329 (30)           | 88 (21)          | 1 (25)         |
| Missing                                                              | 2 (1)              | 0 (0)            | 0 (0)          |
| <b>ZCTA Poverty</b>                                                  |                    |                  |                |
| <10%                                                                 | 314 (29)           | 117 (28)         | 0 (0)          |
| 10% to <20%                                                          | 406 (37)           | 143 (34)         | 0 (0)          |
| 20% to <30%                                                          | 184 (17)           | 75 (18)          | 0 (0)          |
| ≥30%                                                                 | 167 (15)           | 71 (17)          | 1 (25)         |
| Missing                                                              | 21 (2)             | 13 (3)           | 3 (75)         |
| <b>Level of education</b>                                            |                    |                  |                |
| Less than 9 <sup>th</sup> grade                                      | 104 (9)            | 40 (9)           | 0 (0.0)        |
| 9-11 <sup>th</sup> grade                                             | 105 (10)           | 49 (12)          | 0 (0.0)        |
| High school                                                          | 356 (33)           | 192 (46)         | 0 (0.0)        |
| College                                                              | 501 (46)           | 124 (30)         | 1 (25)         |
| Missing                                                              | 26 (2)             | 14 (3)           | 3 (75)         |
| <b>Family member or close acquaintance<sup>^</sup> with COVID-19</b> |                    |                  |                |
| Yes                                                                  | 431 (39)           | 145 (35)         | 0 (0)          |
| No                                                                   | 634 (58)           | 258 (61)         | 1 (25)         |
| Missing                                                              | 27 (3)             | 16 (4)           | 3 (75)         |

| <b>Family member or close acquaintance<sup>^</sup> died from COVID-19</b> |          |          |         |
|---------------------------------------------------------------------------|----------|----------|---------|
| Yes                                                                       | 181 (17) | 48 (12)  | 0 (0)   |
| No                                                                        | 888 (81) | 357 (85) | 1 (25)  |
| Missing                                                                   | 23 (2)   | 14 (3)   | 3 (75)  |
| <b>Multigenerational household</b>                                        |          |          |         |
| Yes                                                                       | 361 (33) | 145 (35) | 0 (0)   |
| No                                                                        | 709 (65) | 261 (62) | 1 (25)  |
| Missing                                                                   | 22 (2)   | 13 (3)   | 3 (75)  |
| <b>Got the flu vaccine or planning to get the flu vaccine</b>             |          |          |         |
| Yes                                                                       | 997 (91) | 287 (69) | 1 (25)  |
| No*                                                                       | 72 (7)   | 119 (28) | 0 (0.0) |
| Missing                                                                   | 23 (2)   | 13 (4)   | 3 (75)  |

\*Includes those who said, "Have not decided". <sup>^</sup>close acquaintance defined as someone who the respondent interacts with weekly. Abbreviations: ZCTA-zip code tabulation area

**Supplemental Figure 1.** Location of zip codes from which surveys were returned and sampled facilities

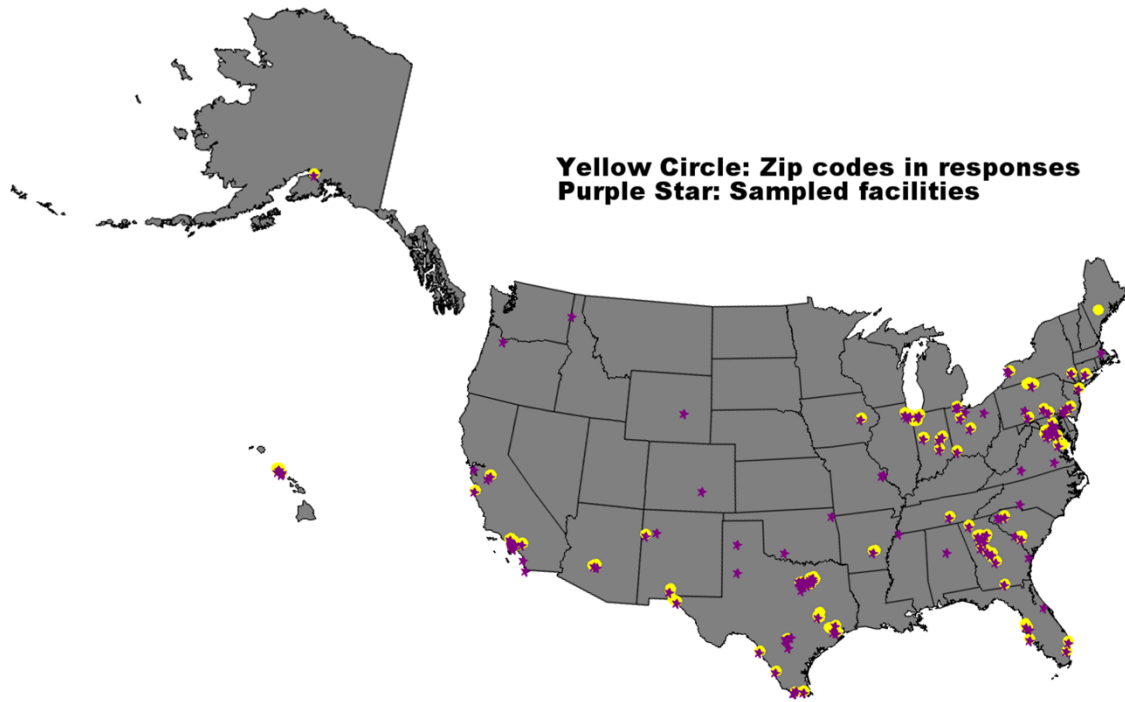

**Supplemental Figure 2.** COVID-19 vaccine information sources

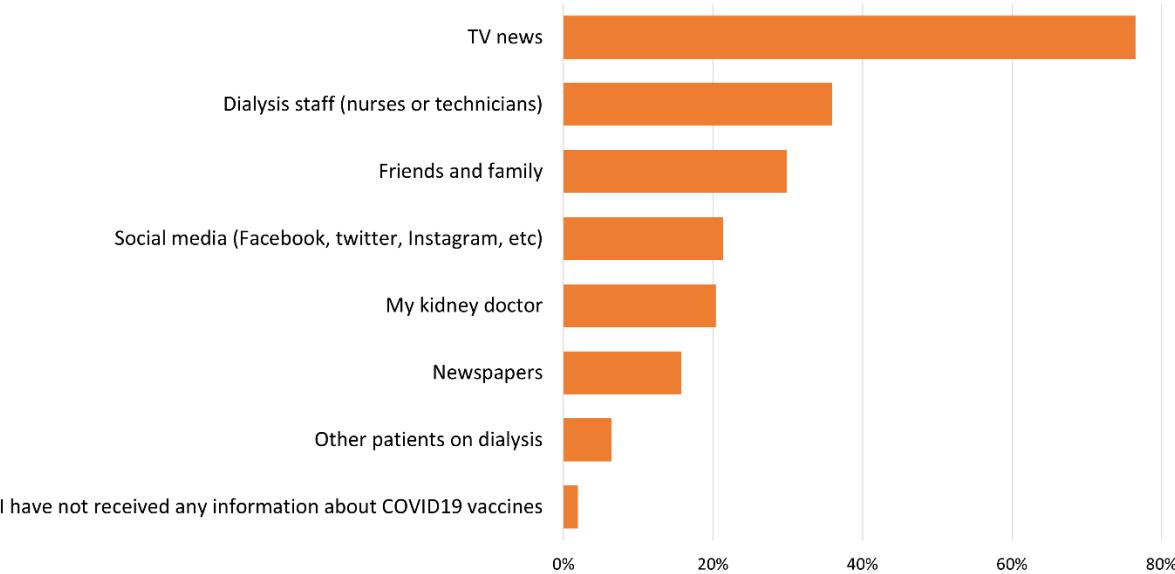

# Vaccine Acceptability SA

---

Start of Block: Block 3

## **DESCRIPTION:**

You are invited to participate in a research study on COVID19 vaccine perspectives in patients who are on dialysis. Vaccines to prevent COVID will become available in upcoming months. As your dialysis care provider, we want to understand your views on COVID vaccines. With Stanford University, we are conducting a survey in our dialysis units. The survey is anonymous.

By answering the survey, you provide your permission for your views to be added to that of other participants' views. Your responses cannot be traced back to you, and your personal information will not be shared with anyone. How you answer these questions will not affect your dialysis or other medical care in any way. Once the survey is completed, we will share the pooled results with patients, doctors, and researchers.

## **TIME INVOLVEMENT:**

Your participation will take approximately 10 minutes.

## **RISKS AND BENEFITS:**

We don't anticipate any risk from this study. Your information will help policymakers understand views of patients on dialysis on COVID19 vaccines. We cannot and do not guarantee or promise that you will receive any benefits from this study. Your decision whether or not to participate in this study will not affect your medical care in anyway.

## **PAYMENTS:**

You will not receive any payments for this survey.

## **PARTICIPANT'S RIGHTS:**

If you have read this form and have decided to participate in this survey, please understand your participation is voluntary and you have the right to withdraw your consent or discontinue participation at any time without penalty or loss of benefits to which you are otherwise entitled. The alternative is not to participate. Your individual privacy will be maintained in all published and written data resulting from the study.

## **CONTACT INFORMATION:**

Questions: If you have any questions, concerns or complaints about this research, its procedures, risks and benefits, contact the Protocol Director, Shuchi Anand, MD, 650 725 2207.

## **INDEPENDENT CONTACT:**

If you are not satisfied with how this study is being conducted, or if you have any concerns,

complaints, or general questions about the research or your rights as a participant, please contact the Stanford Institutional Review Board (IRB) to speak to someone independent of the research team at (650)-723-5244, or toll free at 1-866-680-2906. You can also write to the Stanford IRB, Stanford University, 1705 El Camino Real, Palo Alto, CA 94306.

Please print a copy of this page for your records (or please ask our staff and we will provide you a copy).

If you agree to participate in this research, please proceed to answer the questions in the survey.

---

Are you 18 years old or older?

Yes

No

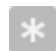

What is your 5 digit dialysis facility zip code? (look at the flyer located in your facility unit for the zip code)

---

End of Block: Block 3

---

Start of Block: COVID19

## COVID19

**This section is related to your views on the COVID19 and the COVID19 vaccine**

---



For the following questions, please choose one answer that best suits to the complete statement below: **"If a COVID 19 vaccine is proven safe and effective for the general population, I would ... :**

- Definitely get the vaccine
  - Probably get the vaccine
  - Probably not get the vaccine
  - Definitely not get the vaccine
  - I am not sure if I would seek to get it
- 

For the following questions, please choose one answer that best suits to the complete statement below: "If a COVID 19 vaccine is proven safe and effective for people on dialysis, I would ... :

- Definitely get the vaccine
  - Probably get the vaccine
  - Probably not get the vaccine
  - Definitely not get the vaccine
  - I am not sure if I would seek to get it
-

Please state **your opinion** about the statements below:

“I would accept a vaccine if it were recommended and provided by my **dialysis facility**, and was approved safe and effective by the government.”

- Completely agree
  - Somewhat agree
  - Neutral/no opinion
  - Somewhat disagree
  - Completely disagree
- 

Please state **your opinion** about the statements below: “I would accept a vaccine if it were **required by my school, employer or residential area**, and was approved safe and effective by the government.”

- Completely agree
  - Somewhat agree
  - Neutral/no opinion
  - Somewhat disagree
  - Completely disagree
-

Please check all that apply regarding your concerns for the COVID19 vaccine:

- I don't think I need it
  - I definitely already had COVID19, so I don't need the vaccine
  - I think I have already had COVID19, so I don't need the vaccine
  - I don't believe COVID19 is a real problem
  - I believe it is better to get natural infection than a vaccine
  - I heard or read news that suggested the COVID19 vaccine is dangerous
  - I am concerned that the vaccine will not work to protect people against COVID19
  - I am concerned about the side effects of the COVID19 vaccine
  - If lots of other people get the vaccine, I won't need it
  - I don't believe in or don't feel comfortable with vaccines in general
  - I have had a previous bad experience or reaction with a vaccine
  - The vaccine is a conspiracy and really isn't for preventing disease
  - Other reason \_\_\_\_\_
-

How much confidence do you have in the current COVID19 vaccine development process?

- A great deal
  - A fair amount
  - Not too much
  - None at all
- 

From where do you receive information about the COVID19 vaccines (Select **all** that apply)?

- Dialysis staff (nurses or technicians)
  - My kidney doctor
  - Other patients on dialysis
  - Friends and family
  - TV news
  - Newspapers
  - Social media (Facebook, twitter, Instagram, etc)
  - I have not received any information about COVID19 vaccines
  - Other \_\_\_\_\_
- 

Were you ever asked to participate in any studies related to COVID19 vaccine?

- Yes
- No

---

Did you agree to participate in the COVID19 vaccine related study?

- Yes
- No

End of Block: COVID19

---

Start of Block: COVID19 Effects

COVID19 Effects

This questions asks you about the effects of the pandemic

---

On a scale of 1-5 **with 5 being the worst effect**, how much has COVID19 pandemic affected your overall sense of well being?

- No effect (I'm living my life identical to before the epidemic)
  - Mild effect (I've cut out a few things but, overall, I don't notice too much)
  - Moderate effect (My life is clearly impacted; I notice it every day)
  - Marked effect (I have had marked changes in my social or working life that are troublesome to me)
  - Severe effect (I feel my life is taken a severe turn for the worse and that I'm a major loss of wellbeing)
-

What is your best guess as to whether you will get COVID19 in the next 6 months (select one)?

- I think will get a mild case of COVID19
- I think I will get seriously ill from COVID19
- I have already had COVID19 and won't get it again
- I don't think I will get COVID19

End of Block: COVID19 Effects

---

Start of Block: HEALTH & FAMILY

**HEALTH & FAMILY** This section pertains to the health of you and your family

---

Do you have, or have you ever had, diabetes?

- Yes
  - No
  - Don't know
- 

Have you had a kidney transplant?

- Yes
  - No
-

In the past 12 months have you been on **medications** that may **lower your ability to fight infections** (e.g., an immunosuppressant)?

- Yes
  - No
  - Don't know
- 

Do you do dialysis via a tunneled catheter?

- Yes
  - No
- 

How many years have you been on dialysis?

- less than 1 year
  - 1 to 3 years
  - more than 3 years
- 

Has a close family member (parent, partner, brother or sister, child, grandparent or grandchild) or a close acquaintance (a person you see or interact with weekly) been sick with COVID19?

- Yes
  - No
-

Has a close family member or a close acquaintance died of COVID19?

Yes

No

---

Do you live in a multigenerational household (household with elderly adults such as grandparents, and children)?

Yes

No

---

Have you gotten the flu shot?

Yes

No

---

Do you plan to get the flu shot this year 2020/2021?

Yes

No

Have not decided

End of Block: HEALTH & FAMILY

---

Start of Block: DEMOGRAPHICS

### DEMOGRAPHICS

**Now, we will ask a few brief questions about you. Your answers are anonymous and cannot be traced back to you individually.**

---



Age in years

- 18-44 years old
  - 45-64 years old
  - 65-79 years old
  - 80 years or older
- 

Sex

- Male
  - Female
  - Prefer not to answer
- 

Do you self identify as Hispanic, Latino or of Spanish Origin?

- Yes
  - No
  - Prefer not to share
-

Do you self identify as (select one):

- White
  - Black or African American
  - American Indian or Alaska Native
  - Asian Indian
  - Chinese
  - Filipino
  - Japanese
  - Korean
  - Vietnamese
  - Native Hawaiian
  - Guamanian or Chamorro
  - Samoan
  - Other pacific islander
  - Other \_\_\_\_\_
  - Prefer not to share
-

What is the highest grade or level of school you completed or the highest degree you have received?

- Less than 9th grade
- 9-11th grade (includes 12th grade with no diploma)
- High school graduate / GED or equivalent
- Some college or AA degree
- College graduate or above

End of Block: DEMOGRAPHICS

---

# Aceptabilidad de vacunas SA

---

Start of Block: Block 3

## **DESCRIPCIÓN:**

Usted está invitado a participar en un estudio de investigación acerca de las perspectivas de la vacuna contra COVID19. Las vacunas para prevenir COVID van a estar disponibles en los próximos meses. Como su proveedor de diálisis, queremos comprender sus opiniones sobre las vacunas contra COVID. Con la Universidad de Stanford, estamos realizando una encuesta en nuestras unidades de diálisis. La encuesta es anónima.

Al responder la encuesta, otorga su permiso para que la información se combine con la información de otras personas. Los investigadores solo tendrán acceso a información agrupada. Nadie sabrá quién completó la encuesta y su información personal no se compartirá con nadie. La forma en que responda estas preguntas no afectará su diálisis u otra atención médica de ninguna manera. Una vez que se complete la encuesta, compartiremos los resultados con los pacientes, los médicos y otros proveedores de atención médica. También vamos a compartir los resultados con los investigadores.

## **TIEMPO DE PARTICIPACIÓN:**

Su participación tomará aproximadamente 10 minutos.

## **RIESGOS Y BENEFICIOS:**

No anticipamos ningún riesgo de este estudio. Esperamos el beneficio de poder compartir sus opiniones y las de otros pacientes sobre las vacunas COVID19 con los legisladores y científicos. No podemos garantizar ni prometemos que recibirá ningún beneficio de este estudio. Su decisión de participar o no en este estudio no afectará su atención médica de ninguna manera.

## **PAGOS:**

No recibirá ningún pago por esta encuesta.

## **DERECHOS DEL PARTICIPANTE:**

Si ha leído este formulario y ha decidido participar en esta encuesta, comprenda que su participación es voluntaria y que tiene derecho a retirar su consentimiento o interrumpir la participación en cualquier momento sin penalización ni pérdida de los beneficios a los que tiene derecho. La alternativa es no participar. Su privacidad se mantendrá en todo momento en los datos publicados y escritos que resulten del estudio.

**INFORMACIÓN DEL CONTACTO:**

Preguntas: Si tiene preguntas, inquietudes o quejas sobre esta investigación, sus procedimientos, riesgos y beneficios, comuníquese con la Directora del Protocolo, la Dra. Shuchi Anand, 650-725-2207.

**CONTACTO INDEPENDIENTE:**

Si no está satisfecho con la forma en que se lleva a cabo este estudio, o si tiene alguna inquietud, queja o pregunta general sobre la investigación o sus derechos como participante, comuníquese con la Junta de Revisión Institucional de Stanford (IRB) para hablar con alguien independiente del equipo de investigación al (650)-723-5244, o al número gratuito 1-866-680-2906. También puede escribir a Stanford IRB, Stanford University, 1705 El Camino Real, Palo Alto, CA 94306.

Imprima una copia de esta página para sus registros (o pregunte a nuestro personal y le proporcionaremos una copia).

Si acepta participar en esta investigación, proceda a responder las preguntas de la encuesta.

---

Usted tiene 18 años o mas?

- Si
  - No
- 

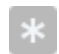

¿Cuál es el zip code de 5 dígitos de su unidad de diálisis? (Ver en el flyer de su unidad de diálisis para obtener esta información)

---

End of Block: Block 3

---

Start of Block: COVID19

**COVID-19**

**Esta sección está relacionada con sus opiniones sobre la vacuna y la enfermedad de COVID19**

---

Para las siguientes preguntas, elija la respuesta que mejor se adapte al enunciado completo a continuación: **“Si se demuestra que una vacuna COVID 19 es segura y eficaz para la población en general yo ...:**

- Definitivamente obtengo la vacuna
  - Probablemente obtengo la vacuna
  - Probablemente no obtengo la vacuna
  - Definitivamente no obtengo la vacuna
  - No estoy seguro si buscaría obtener la vacuna
- 

Para las siguientes preguntas, elija la respuesta que mejor se adapte al enunciado completo a continuación: **“Si se demuestra que la vacuna COVID 19 es segura y eficaz para las **personas en diálisis**, yo ...:**

- Definitivamente obtengo la vacuna
  - Probablemente obtengo la vacuna
  - Probablemente no obtengo la vacuna
  - Definitivamente no obtengo la vacuna
  - No estoy seguro si buscaría obtener la vacuna
-

Por favor seleccione **su opinión** para los siguientes enunciados

"Aceptaría una vacuna si la **recomendara** y la proporcionara **mi centro de diálisis** y el gobierno la aprobara como segura y eficaz"

- Completamente de acuerdo
  - Parcialmente de acuerdo
  - Neutral / sin opinión
  - En desacuerdo
  - Totalmente en desacuerdo
- 

Por favor seleccione su opinion para los siguientes enunciados "Aceptaría una vacuna si fuera **requerida por mi universidad, empleador o área residencial**, y el gobierno la aprobara como segura y efectiva".

- Completamente de acuerdo
  - Parcialmente de acuerdo
  - Neutral / sin opinión
  - En desacuerdo
  - Totalmente en desacuerdo
-

Marque todo lo que corresponda con respecto a sus inquietudes sobre la vacuna COVID19:

- No creo que lo necesite
  - Definitivamente ya tuve COVID19, entonces no necesito la vacuna
  - Yo creo que a mi ya me dio COVID19, entonces no necesito la vacuna
  - No creo que COVID19 sea un problema real
  - Creo que es mejor contraer una infección natural que una vacuna
  - Escuché o leí noticias que sugerían que la vacuna COVID19 es peligrosa
  - Me preocupa que la vacuna no funcione para proteger a las personas contra COVID19
  - Me preocupan los efectos secundarios de la vacuna contra COVID19
  - Si muchas otras personas reciben la vacuna, no la necesitaré
  - No creo en las vacunas o no me siento cómodo con las vacunas en general
  - He tenido una mala experiencia previa o una reacción con una vacuna
  - La vacuna es una conspiración y realmente no es para prevenir enfermedades
  - Otra razon \_\_\_\_\_
-



¿Cuánta confianza tiene en el proceso actual de desarrollo de la vacuna para COVID19?

- Bastante confianza
  - Un buena cantidad de confianza
  - Poca confianza
  - Nada de confianza
- 

¿De dónde recibe información sobre la vacuna COVID19? (seleccione **todas** las que correspondan)

- Personal en la unidad de diálisis (técnicos o enfermeras/os)
  - Mi doctor de los riñones
  - Otros pacientes en diálisis
  - Amigos o familia
  - En las noticias en la TV
  - Noticias en los periodicos
  - Redes sociales (Facebook, twitter, Instagram, etc)
  - Yo no he recibido ninguna información acerca de las vacunas contra COVID19
  - Otra \_\_\_\_\_
-

¿Alguna vez se le pidió que participara en algún estudio relacionado con la vacuna COVID19?

- Si
  - No
- 

¿Estuvo de acuerdo en participar en el estudio relacionado con la vacuna de COVID19?

- Si
- No

End of Block: COVID19

---

Start of Block: Block 4

Efectos de COVID19

Estas preguntas preguntan acerca de los efectos de la pandemia

---

En una escala de 1 a 5, **siendo 5 el peor efecto**, ¿cuánto ha afectado la pandemia de COVID19 a su sensación general de bienestar?

- Sin efecto (estoy viviendo mi vida idéntica a antes de la epidemia)
  - Efecto leve (he recortado algunas cosas pero, en general, no noto demasiado)
  - Efecto moderado (Mi vida está claramente afectada; lo noto todos los días)
  - Efecto marcado (he tenido cambios marcados en mi vida social o laboral que me resultan problemáticos)
  - Efecto severo (siento que mi vida ha empeorado gravemente y que soy una gran pérdida de bienestar)
-

¿Cuál es su mejor estimación sobre si le va a dar COVID19 en los próximos 6 meses (seleccione una)?

- Creo que tendré un caso leve de COVID19
- Creo que me enfermaré gravemente de COVID19
- Ya me dio COVID19
- No creo que me vaya a dar COVID19

End of Block: Block 4

---

Start of Block: SALUD Y FAMILIA

### **SALUD Y FAMILIA**

**Esta sección se refiere a su salud y la de su familia.**

---

¿Tiene, o ha tenido alguna vez diabetes?

- Si
  - No
  - No se
- 

¿Alguna vez ha tenido un trasplante de riñón?

- Si
  - No
-

¿En los últimos 12 meses ha estado tomando **medicamentos** que pueden **disminuir su habilidad para combatir infecciones** (ej. Inmunosupresor)?

- Si
  - No
  - No se
- 

¿Recibe diálisis usando un catéter tunelizado?

- Si
  - No
- 

¿Cuántos años lleva en diálisis?

- Menos de 1 año
  - 1 a 3 años
  - Mas de 3 años
- 

¿Algún familiar cercano (padres, pareja, hermano o hermana, hijo, abuelo o nieto) o amigo cercano suyo (persona con la que usted interactua semanalmente) ha estado enfermo de COVID19?

- Si
  - No
-

¿Algún familiar cercano o pariente cercano suyo falleció por COVID19?

- Si
- No
- 

¿Vive en un hogar multigeneracional, es decir, un hogar con adultos mayores como abuelos e hijos?

- Si
- No
- 

¿Ha recibido la vacuna contra la influenza?

- Si
- No
- 

¿Tiene planes de recibir la vacuna contra la influenza este año (2020/2021)?

- Si
- No
- No me he decidido
- 

End of Block: SALUD Y FAMILIA

---

Start of Block: Demografía

## DEMOGRAFÍA

**Ahora, le haremos algunas preguntas breves sobre usted. Sus respuestas son anónimas y no se pueden rastrear hasta usted individualmente.**

---

Edad en años

- 18-44 años
  - 45-64 años
  - 65-79 años
  - Mas o igual a 80 años
- 

Género

- Masculino
  - Femenino
  - Prefiero no contestar
- 

¿Se identifica como Hispano, Latino o de origen español?

- Si
  - No
  - Prefiere no contestar
-

Se identifica con algunas de las siguientes razas (seleccionar uno):

- Blanca
  - Afroamericana o raza negra
  - Amerindio o nativo de Alaska
  - Asiático/a de la India
  - Chino
  - Filipino
  - Japonés
  - Coreano
  - Vietnamés
  - Hawaiano nativo
  - Guameño o Chamorro
  - Samoano
  - Otro isla del pacífico
  - Alguna otra raza \_\_\_\_\_
  - Prefiero no compartir
-

¿Cuál es el nivel o grado más alto que completo o el título más alto que ha recibido en la escuela?

- Menos que 9no. Grado
- 9-11vo. Grado (incluye grado 12 sin diploma)
- Graduado de la secundaria
- Asistió a la universidad o un técnico superior universitario
- Título universitario o más alto

End of Block: Demografía

---
